# Supplementary material for: Sulfur-incorporated carbon quantum dots with a strong long-wavelength absorption band
Source: Royal Society of Chemistry journal article supplement (doi:10.1039/c3tc00683b), 2013-01-01
Supplement: c3tc00683b.pdf [file c3tc00683b.pdf]

Electronic Supplementary Information for  
Sulfur-incorporated carbon quantum dots with a strong long-wavelength  
absorption band

Woosung Kwon<sup>a</sup>, Jongchul Lim<sup>b</sup>, Jinuk Lee<sup>a</sup>, Taiho Park<sup>b\*</sup>, and Shi-Woo Rhee<sup>a\*</sup>

<sup>a</sup>System on a Chip Chemical Process Research Center,  
Department of Chemical Engineering, Pohang University of Science and Technology  
(POSTECH), Pohang 790-784, South Korea;  
E-mail: [srhee@postech.ac.kr](mailto:srhee@postech.ac.kr) ; Tel: +82-54-279-2265; Fax: 82-54-279-8619

<sup>b</sup>Polymer Chemistry & Electronics Laboratory,  
Department of Chemical Engineering, Pohang University of Science and Technology  
(POSTECH), Pohang 790-784, South Korea;  
E-mail: [taihopark@postech.ac.kr](mailto:taihopark@postech.ac.kr) ; Tel: +82-54-279-2394; Fax: 82-54-279-5295

\*Corresponding author. E-mail: [taihopark@postech.ac.kr](mailto:taihopark@postech.ac.kr), [srhee@postech.ac.kr](mailto:srhee@postech.ac.kr)

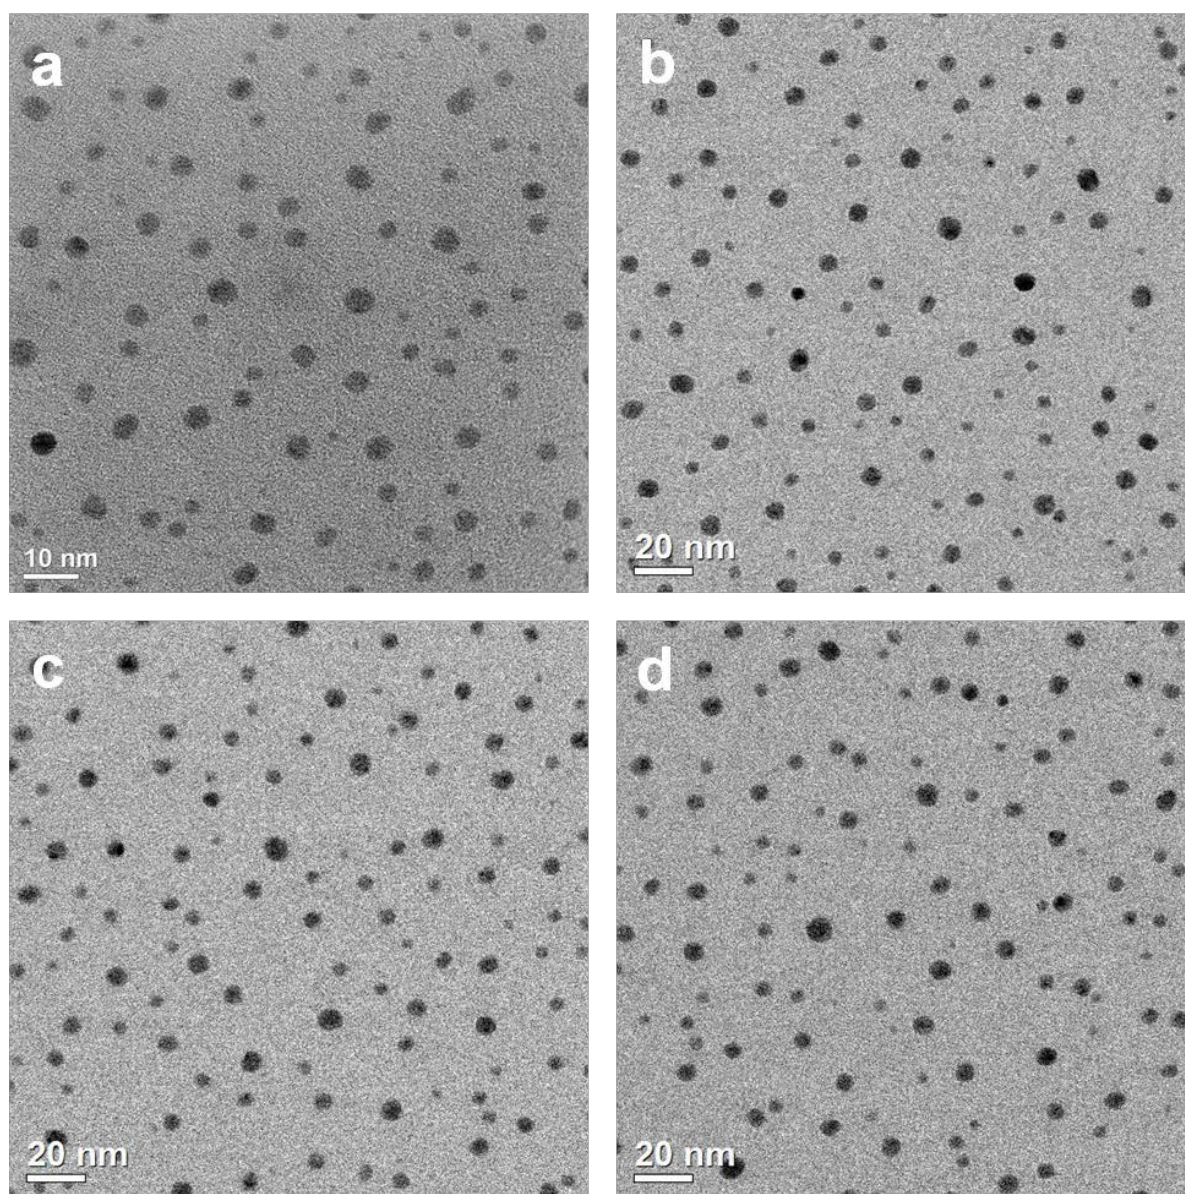

Figure S1. Additional TEM images of a series of the S-CQDs: (a) bare, (b) S1, (c) S2, and (d) S3.



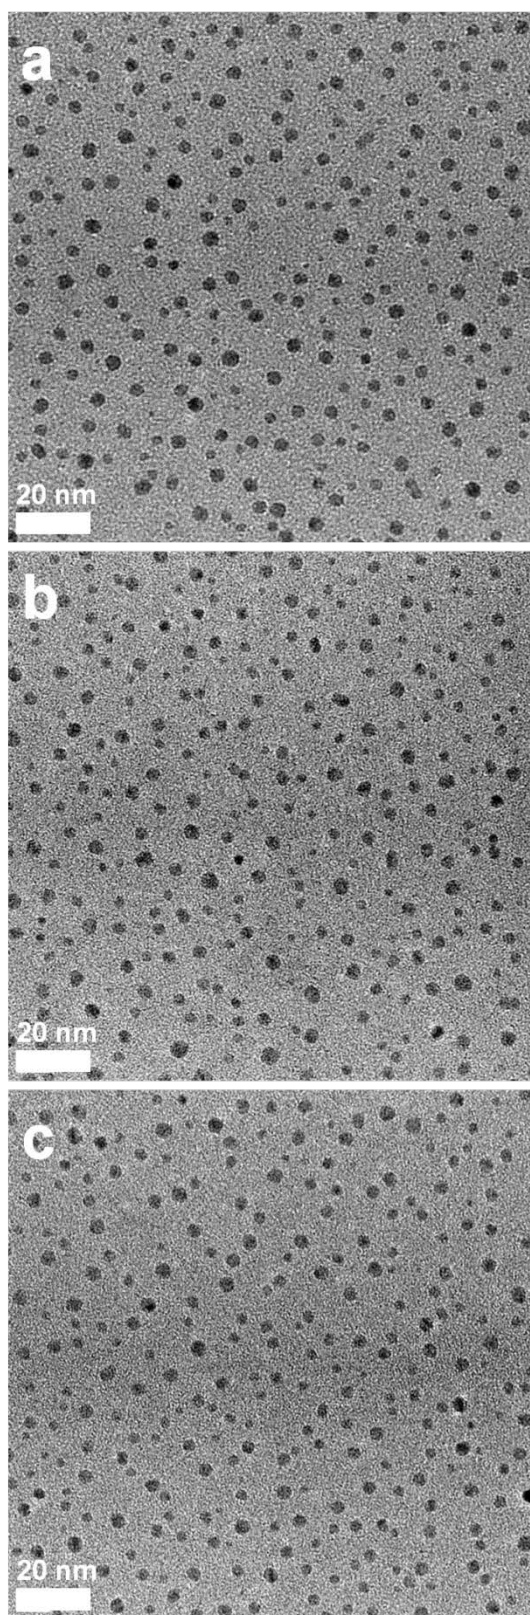

Figure S2. Additional low-magnification TEM images of a series of the S-CQDs: (a) S1, (b) S2, and (c) S3.

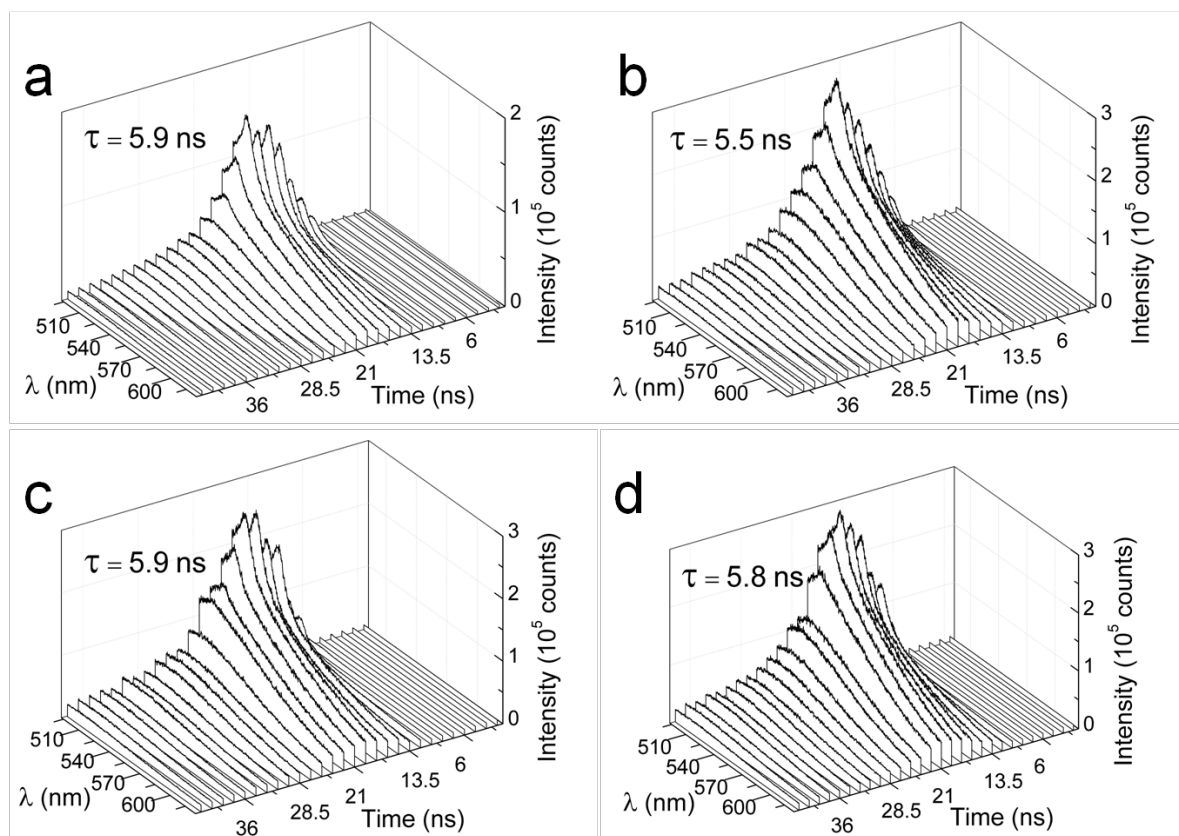

Figure S3. Time-resolved emission decay spectra (excitation wavelength = 460 nm) of a series of the S-CQDs: (a) bare, (b) S1, (c) S2, and (d) S3. The time interval between each emission spectrum is 1.5 ns.

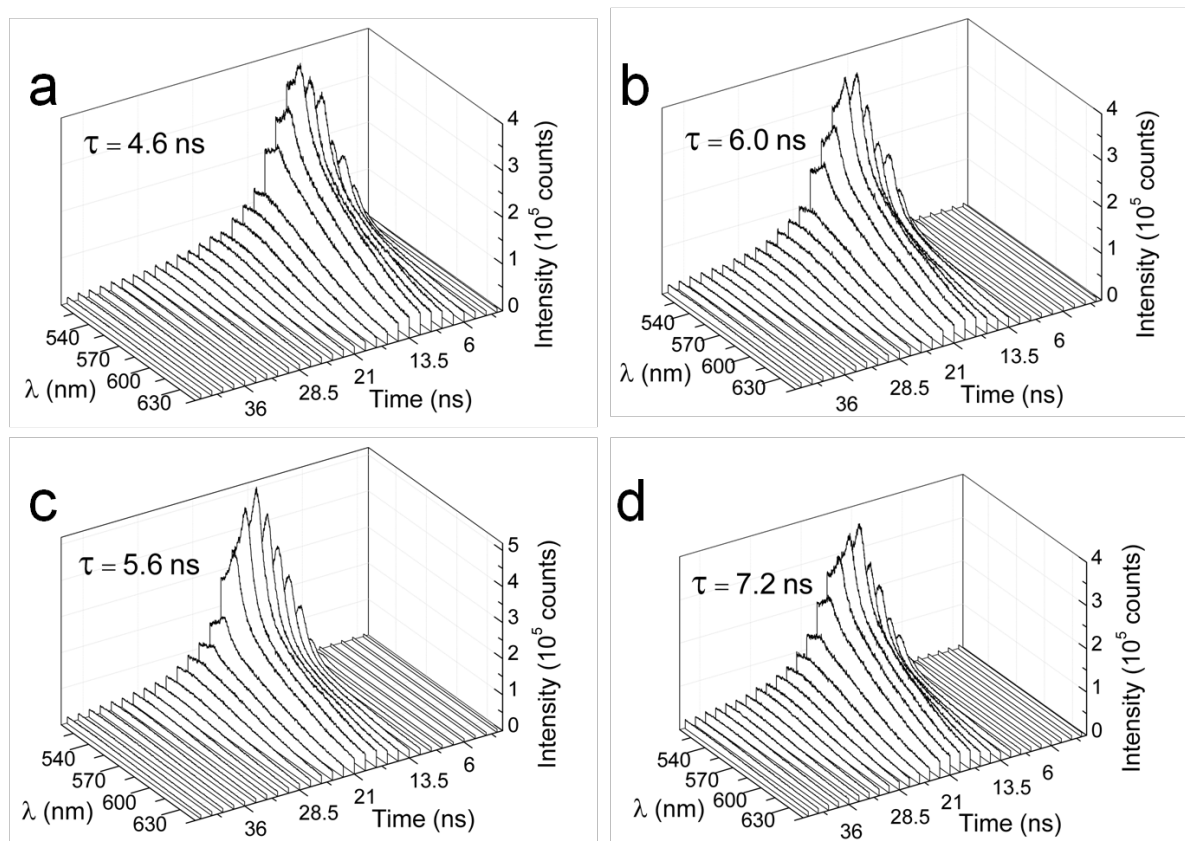

Figure S4. Time-resolved emission decay spectra (excitation wavelength = 480 nm) of a series of the S-CQDs: (a) bare, (b) S1, (c) S2, and (d) S3. The time interval between each emission spectrum is 1.5 ns.

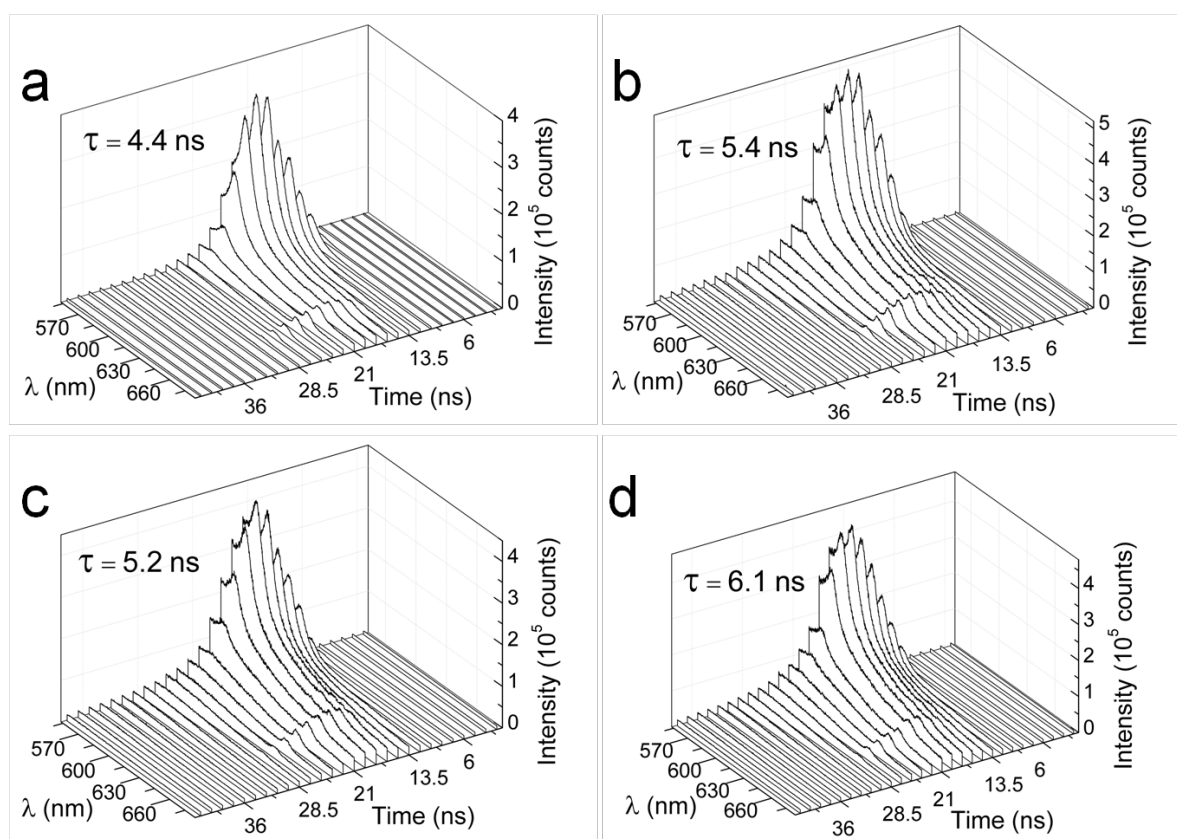

Figure S5. Time-resolved emission decay spectra (excitation wavelength = 520 nm) of a series of the S-CQDs: (a) bare, (b) S1, (c) S2, and (d) S3. The time interval between each emission spectrum is 1.5 ns.
